# Supplementary material for: The Rescue and Characterization of Recombinant, Microcephaly-Associated Zika Viruses as Single-Round Infectious Particles
Source: PubMed Central journal article supplement (PMC6893733; doi:10.3390/v11111005), 2019-10-31
Supplement: viruses-11-01005-s001.pdf [file viruses-11-01005-s001.pdf]

**Supplemental Table 1. The primer pairs for cloning Zika virus replicon and prM-E gene into the expression vector**

| Primer           | Primer sequence (5'→3')                                      | Restriction enzyme site |
|------------------|--------------------------------------------------------------|-------------------------|
| A For EcoRI-CMV  | 5'- GATTACGAATTCTTGACATTGATTATTG -3'                         | EcoRI                   |
| A Rev 2A-NotI    | 5'- GTATGTACGCGCCGCGGGCCCGGGTTGGACTCAACGTC -3'               | NotI                    |
| B1F NotI-E-NS1   | 5'- GAAGCTCGCGCCGCATTGGGCAAGGGCATCCATC -3'                   | NotI                    |
| B1R NS1-Link1    | 5'- CTCTTGTTCCACATGTTTCCTCCACG -3'                           |                         |
| B2F NS1-Link2    | 5'- GAATGCCCCGGGCACTAAGGTCCACGTGG -3'                        |                         |
| B2R NS-ClaI-XhoI | 5'- GCAGCTCGAGTTCAGCATCGATGGCTCGAAGCACTC -3'                 | ClaI 、XhoI              |
| CF ClaI-NS       | 5'- GAGCCATCGATGCTGAAGAAGAAGCAGCTAACTGTC -3'                 | ClaI                    |
| CR NS-RsrII-XhoI | 5'- TTCTCGAGAGGCGGTCCGCGACAGTATGG -3'                        | RsrII 、XhoI             |
| DF NS-RsrII      | 5'- CCATACTGTCGCGGACCGCCT -3'                                | RsrII                   |
| DR BGH-XhoI      | 5'- GACGACCTCGAGCCATAGAGCCCACCGCATCCCCAGC -3'                | XhoI                    |
| prM/E-For        | 5'- AACTTAAGCTTACCATGCGTGGGAGTGCATACATATGTAAGTGGACAGAAAC -3' | EcoRI                   |
| prM/E-Rev        | 5'- TCTAGACTCGAGTTACACATCAGCAGAGACGGCTG -3'                  | XhoI                    |

**Supplemental Table 2. Primers for sequencing Zika virus replicon**

| <b>Primer</b>        | <b>Primer sequence (5'→3')</b>   |
|----------------------|----------------------------------|
| CMV seq-63-80F       | 5'-CATATATGGAGTTCCGCG-3'         |
| ZIKV seq-305-324     | 5'-CAATAGATGGGGTTCAGTGG-3'       |
| ZIKV seq-1902-1920   | 5'-ACCGCAGCGTTCACATTCA-3'        |
| ZIKV seq-2855-2873   | 5'-CTTCGTCAGAGCAGCAAAG-3'        |
| ZIKV seq-3701-3718   | 5'- TGACCTGGCTAAGCTTGC -3'       |
| ZIKV seq-4661-4680   | 5'- GGAGACCACAGATGGAGTGT -3'     |
| ZIKV seq-5502-5520   | 5'- GCAAGAGGATACATTCAA -3'       |
| ZIKV seq-6460-6478   | 5'- AAAGAGGAGCGGCTTTTGG -3'      |
| ZIKV seq-7301-7319   | 5'- AGCAGCTGCGCGTGCTGCC -3'      |
| ZIKV seq-8257-8275   | 5'- GACTGCAGCGTAGGTATGG -3'      |
| ZIKV seq-9102-9120   | 5'- TGGCTAGGGGCTAGATTTC -3'      |
| ZIKV seq-10051-10069 | 5'- CTACCTGGTCAATCCATGG -3'      |
| P3 Rev (Sacl)        | 5'- AGCCTGAGCTCCAGGCTCTC -3'     |
| Zika C1-Rev          | 5'- ACACAGTGAAGTGGCTG -3'        |
| Zika-NS5 Rev(2)      | 5'- GTGGTGGGAGCAAAACGGA ACTT -3' |

**Supplemental Table 3. Primer pairs for real-time quantitative RT-PCR of ZIKV E and NS5 RNA copies**

| <b>Primer</b>                                  | <b>Primer sequence (5'→3')</b>   |
|------------------------------------------------|----------------------------------|
| <b>ZIKV-E For</b>                              | 5'- CAAGATCCCGGCTGAAACTG- 3'     |
| <b>ZIKV-E Rev</b>                              | 5'- TTCTCCCGACTCCTATGACAATG- 3'  |
| <b>ZIKV-NS5 For (antisense cDNA synthesis)</b> | 5'- ACCCTGGGATGTGGTG -3'         |
| <b>ZIKV-NS5 Rev (sense cDNA synthesis)</b>     | 5'- GTTGAGGGTTTCCACTCTTG -3'     |
| <b>Zikz-NS5 For(2)</b>                         | 5'- CTTGTGGCTGCTGCGGAGGTCA -3'   |
| <b>Zikz-NS5 Rev(2)</b>                         | 5'- GTGGTGGGAGCAAAACGGA ACTT -3' |

## A.

TTGACATTGATTATTGAC.....{CMV promoter nt1-601}.... GCTGGTTTAGTGAACCGT  
 agttgttgatctgtgtga.....{ZIKV<sup>Asian</sup> Natal RGN strain nt1-500}...actagacgtgggagtgca  
 ATGGTGAGCAAGGGCGAG.....{EGFP nt1-717}.....ATGGACGAGCTGTACAAG  
 AACTTTGATTTGCTCAAG.....{FMDV-2A nt1-51}.....GAGTCCAACCCCGGGCCC  
 tactatatgtacttgac...{ZIKV<sup>Asian</sup> Natal RGN strain nt501-3364}.....cgtggaggaacatgtgg

## B.

|                                                                                    |                                                                             |                                                                                                                                                                                                                                   |           |
|------------------------------------------------------------------------------------|-----------------------------------------------------------------------------|-----------------------------------------------------------------------------------------------------------------------------------------------------------------------------------------------------------------------------------|-----------|
| Plasmid No.                                                                        | 160506SV7732-3MR30                                                          | Storage                                                                                                                                                                                                                           | -20° C    |
| Cloning Site                                                                       | EcoRI/Acc65I                                                                | Host                                                                                                                                                                                                                              | STBL3     |
| Resistance                                                                         |                                                                             | Plasmid Qty.                                                                                                                                                                                                                      | 4 µg/Vial |
| Note                                                                               | BBI keep the stock of plasmid and a copy of sequencing report for 3 months. |                                                                                                                                                                                                                                   |           |
| Restriction Enzyme Digestion Analysis:                                             |                                                                             |                                                                                                                                                                                                                                   |           |
| Results                                                                            |                                                                             | Description                                                                                                                                                                                                                       |           |
| 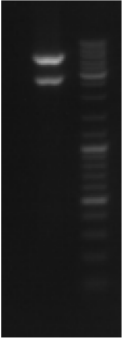 |                                                                             | Enzyme: EcoRI/Acc65I<br>Expected Size: 4733+2.7k<br>Marker Ladder: 100bp, 200bp, 300bp, 400bp, 500bp, 600bp, 700bp, 800bp, 900bp, 1000bp, 1200bp, 1500bp, 2000bp, 2500bp, 3000bp, 3500bp, 4000bp, 5000bp, 6000bp, 8000bp, 10000bp |           |

**Supplemental Figure 1.** The construction of in-frame gene fusion (A), plasmid information and restriction enzyme digestion analysis (B) of the synthesized DNA segment I.

## A.

cgggcactaaggtccacg..{ ZIKV<sup>Asian</sup> Natal RGN strain nt3331-10808}.gggaaatccatgggtctt  
 GGGTCGCCCAGGAATGGC.....{HDVr nt1-79}.....GATGGCCGGCATGGTCCC  
 CGACTGTGCCTTCTAGTT.....{bGH PA terminator nt1-228}... ATGCGGTGGGCTCTATGG

## B.

|                                                                                    |                                                                             |                                                                                                                                                                                                                                                        |            |
|------------------------------------------------------------------------------------|-----------------------------------------------------------------------------|--------------------------------------------------------------------------------------------------------------------------------------------------------------------------------------------------------------------------------------------------------|------------|
| Plasmid No.                                                                        | 160603V7294-2MR4                                                            | Storage                                                                                                                                                                                                                                                | -20° C     |
| Cloning Site                                                                       | EcoRI/Acc65I                                                                | Host                                                                                                                                                                                                                                                   | top10      |
| Resistance                                                                         |                                                                             | Plasmid Qty.                                                                                                                                                                                                                                           | 4 μ g/Vial |
| Note                                                                               | BBI keep the stock of plasmid and a copy of sequencing report for 3 months. |                                                                                                                                                                                                                                                        |            |
| Restriction Enzyme Digestion Analysis:                                             |                                                                             |                                                                                                                                                                                                                                                        |            |
| Results                                                                            |                                                                             | Description                                                                                                                                                                                                                                            |            |
|  |                                                                             | <b>Enzyme:</b> EcoRI/Acc65I<br><b>Expected Size:</b> 7784+2.7k<br><b>Marker Ladder:</b> 100bp, 200bp, 300bp, 400bp, 500bp, 600bp, 700bp, 800bp, 900bp, 1000bp, 1200bp, 1500bp, 2000bp, 2500bp, 3000bp, 3500bp, 4000bp, 5000bp, 6000bp, 8000bp, 10000bp |            |

**Supplemental Figure 2.** The construction of in-frame gene fusion (A), plasmid information and restriction enzyme digestion analysis (B) of the synthesized DNA segment II.

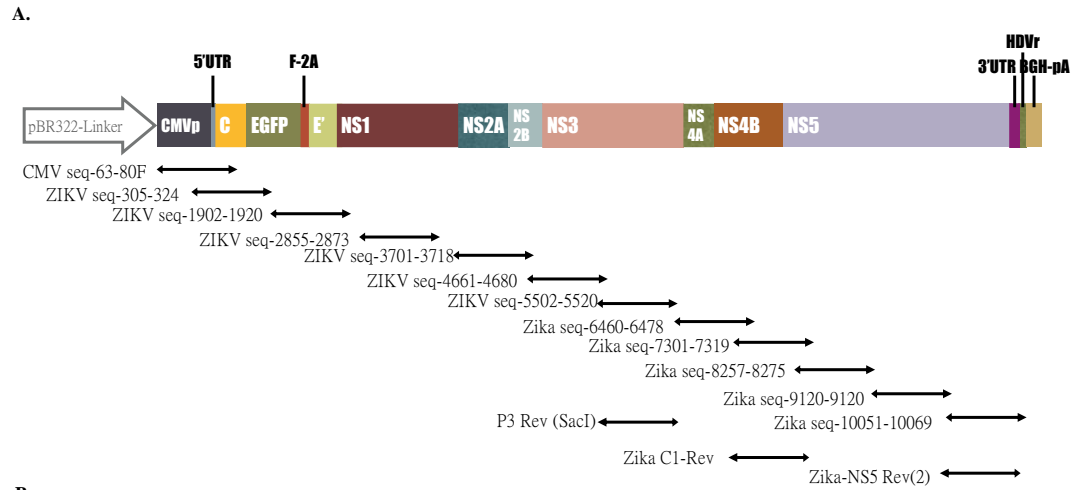

**B.**

| No. | Protein | Codon mutation | Amino acid substitution |
|-----|---------|----------------|-------------------------|
| 1   | NS1     | ACA → ACC      | T829T                   |
| 2   | NS3     | GTT → GTA      | V2962V                  |
| 3   | NS5     | CTG → CGG      | L3277R                  |
| 4   | NS5     | GAA → AAC      | E3280N                  |

**Supplemental Figure 3.** Sequencing analysis of ZIKV<sup>Asian</sup><sub>Natal</sub> RGN replicon with the primers listed in Supplemental Table 2 (A). The amino acid substitutions were also shown in the Figure.
